# Supplementary material for: Alleviation Syndrome of High-Cholesterol-Diet-Induced Hypercholesterolemia in Mice by Intervention with Lactiplantibacillus plantarum WLPL21 via Regulation of Cholesterol Metabolism and Transportation as Well as Gut Microbiota
Source: MDPI journal article supplement (doi:10.3390/nu15112600), 2023-06-01
Supplement: s1 [file s1]

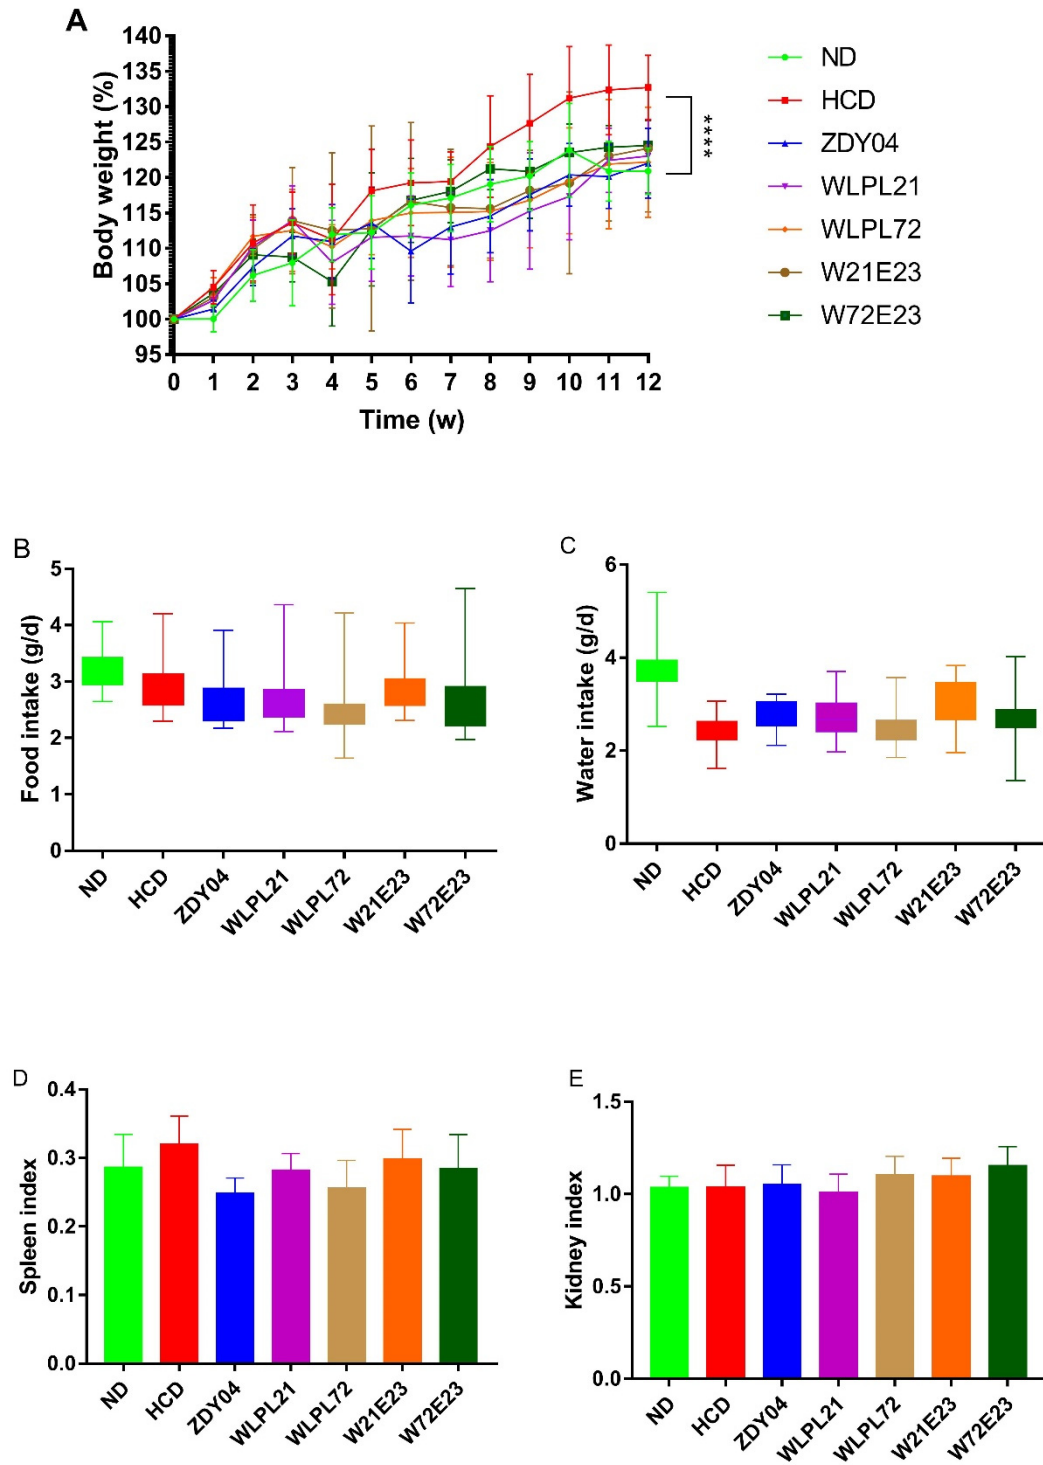

**Figure S1.** Effect of probiotics on physics and visceral index in high cholesterol diet-induced hypercholesterolemia. Body weight (A), food intake (B) and water intake (C) were recording. Index of spleen (D) and kidney (E) was indicated as ratio of organ/weight  $\times 100$ . ND: normal diet; HCD: high cholesterol diet; ZDY04: HCD with *Lactiplantibacillus plantarum* ZDY04; WLPL21: *L. plantarum* WLPL21; WLPL72: *L. plantarum* WLPL72; W21E23: HCD with bacterial cocktail of *L. plantarum* WLPL21 and *Enterococcus faecium* W21E23; W72E23: HCD with bacterial cocktail of *L. plantarum* WLPL21 and *E. faecium* W72E23. Data were expressed as mean  $\pm$  SD. \*\*\*\* $p < 0.0001$ , data in HCD were compared to HCD.

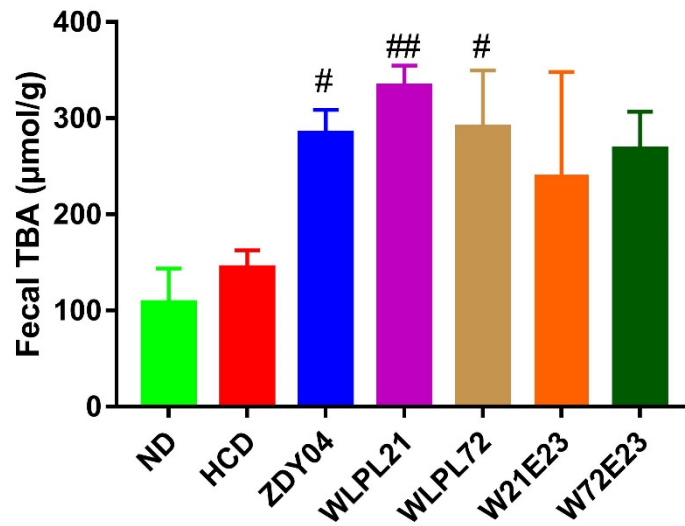

**Figure S2.** Effect of probiotics on cholesterol metabolism by detecting total bile acid (TBA) in fecal. ND: normal diet; HCD: high cholesterol diet; ZDY04: HCD with *L. plantarum* ZDY04; WLPL21: *L. plantarum* WLPL21; WLPL72: *L. plantarum* WLPL72; W21E23: HCD with bacterial cocktail of *L. plantarum* WLPL21 and *E. faecium* WEFA23; W72E23: HCD with bacterial cocktail of *L. plantarum* WLPL21 and *E. faecium* WEFA23. Data were expressed as mean  $\pm$  SD. \* $p < 0.05$ , \*\* $p < 0.01$ , data in probiotic groups were compared to HCD.

A

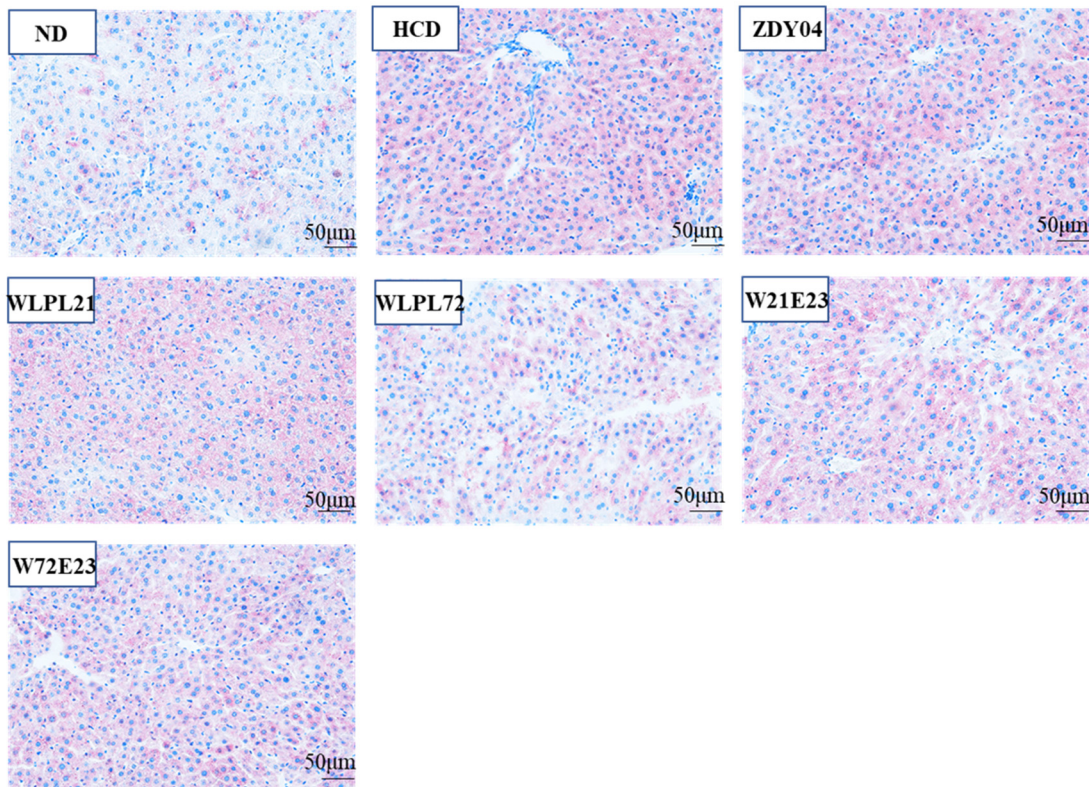

B

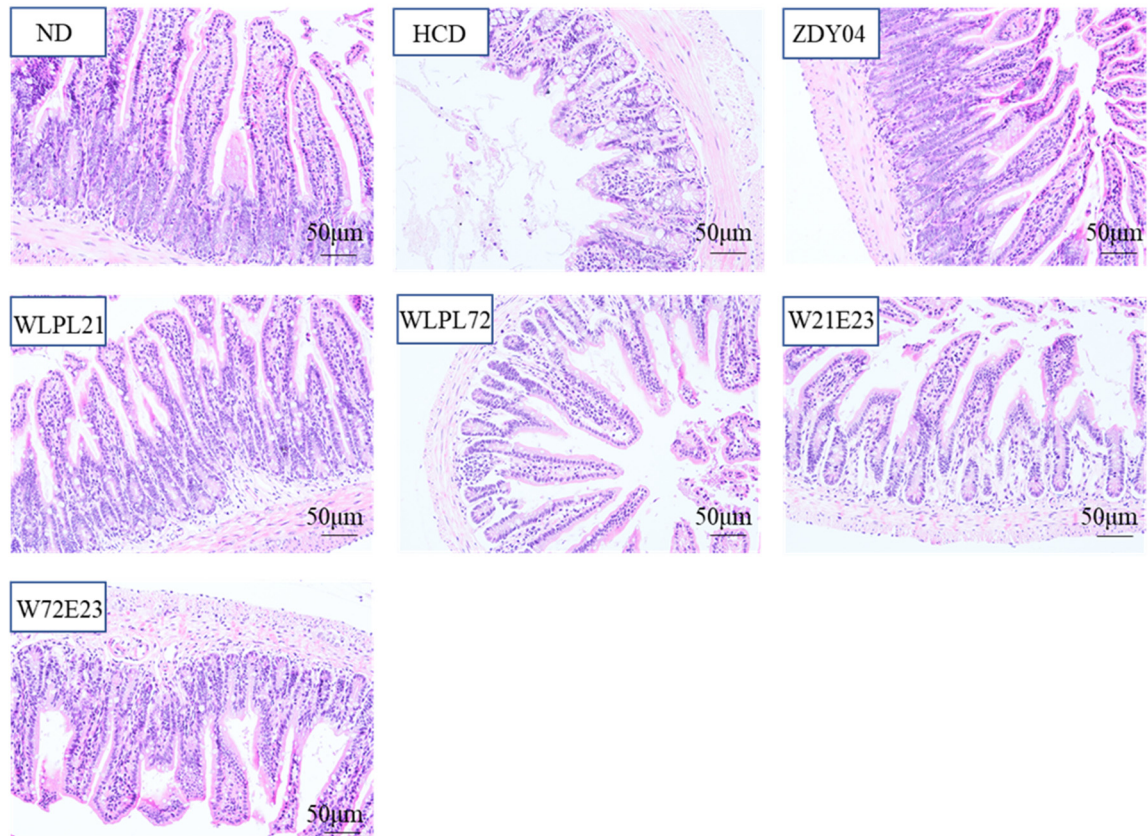

**Figure S3.** Effect of probiotics on hepatic lipid deposition detected by oil Red O (A) ( $\times 200$ ) and histology of intestine tissue analyzed by H & E (B) ( $\times 200$ ) in hypercholesterolemic mice. ND: normal diet; HCD: high cholesterol diet; ZDY04: HCD with *L. plantarum* ZDY04; WLPL21: *L. plantarum* WLPL21; WLPL72: *L. plantarum* WLPL72; W21E23: HCD with bacterial cocktail of *L. plantarum* WLPL21 and *E. faecium* WEFA23; W72E23: HCD with bacterial cocktail of *L. plantarum* WLPL21 and *E. faecium* WEFA23.
